# Supplementary material for: miR-23a Promotes the Transition from Indolent to Invasive Colorectal Cancer
Source: Oxford University Press journal article supplement (doi:10.1158/2159-8290.cd-11-0267), 2012-03-30
Supplement: 21598290cd110267-sup-meth_58k.pdf [file 21598290cd110267-sup-meth_58k.pdf]

## Supplemental Methods

### List of Antibodies:

| Antibody           | Manufacturer   |
|--------------------|----------------|
| C-Jun              | Cell Signaling |
| C-Jun (Ser63)      | Millipore      |
| C-Myc              | Cell Signaling |
| C-Myc(Thr58/Ser62) | Millipore      |
| MTSS1              | Cell Signaling |
| Beta-actin         | Abcam          |
| FBXW7              | LSBio          |
| RhoB               | Santa Cruz     |
| Src                | Cell Signaling |
| Src (416)          | Cell Signaling |
| Myc-tag            | Cell Signaling |
| Muc2               | Novacastra     |
| F-actin            | Invitrogen     |

All were used according to the manufacturer's recommendation.
